# Supplementary material
Source: PubMed Central journal article supplement (PMC3569957)
Supplement: Supp_Fig1.pdf [file Supp_Fig1.pdf]

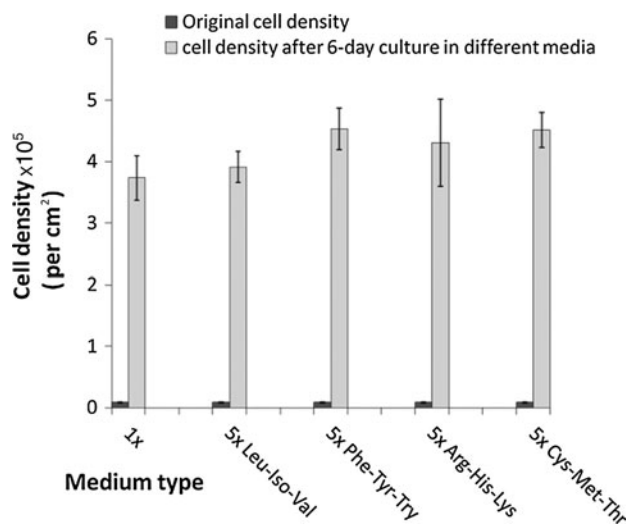

**SUPPLEMENTARY FIG. S1.** Essential amino acid concentrations up to five times physiological had no detrimental effect on viability or cell proliferation in monolayer culture over 6 days (mean  $\pm$  SD,  $n=5$ ).
